# Supplementary material
Source: Springer Nature journal article supplement (https://www.springermedizin.de/resource/supplementary/12905_2012_504_MOESM5_ESM.pdf/9518634)
Supplement: MOESM5 [file 9518634]

**Table 4 Logistic Regression Of Predictors Of Intimate Partner Violence Experience**

| <b>Variables</b>                         | <b>Odds Ratio</b> | <b>Confidence Interval</b> | <b>p-value</b> |
|------------------------------------------|-------------------|----------------------------|----------------|
| <b>Level of study</b>                    |                   |                            |                |
| 1 <sup>st</sup> -3 <sup>rd</sup> year    | 1.000             |                            |                |
| 4 <sup>th</sup> -6 <sup>th</sup> year    | 0.895             | 0.695-1.152                | 0.389          |
| Postgraduate                             | 0.644             | 0.479-0.866                | 0.004          |
| <b>Smokes</b>                            |                   |                            |                |
| No                                       | 1.000             |                            |                |
| Yes                                      | 1.459             | 0.880-2.420                | 0.143          |
| <b>Consumes alcohol</b>                  |                   |                            |                |
| No                                       | 1.000             |                            |                |
| Yes                                      | 2.272             | 1.685-3.063                | <0.001         |
| <b>History of interparental violence</b> |                   |                            |                |
| No                                       | 1.000             |                            |                |
| Yes                                      | 2.542             | 1.965-3.288                | <0.001         |
| <b>Marital status</b>                    |                   |                            |                |
| Married                                  | 1.000             |                            |                |
| Single                                   | 3.223             | 2.042-5.085                | <0.001         |
